# Supplementary material
Source: PubMed Central journal article supplement (PMC4807505)
Supplement: AEM.03718-15_zam999117047so1.pdf [file AEM.03718-15_zam999117047so1.pdf]

1 Supplemental Material

2 Fig. S1

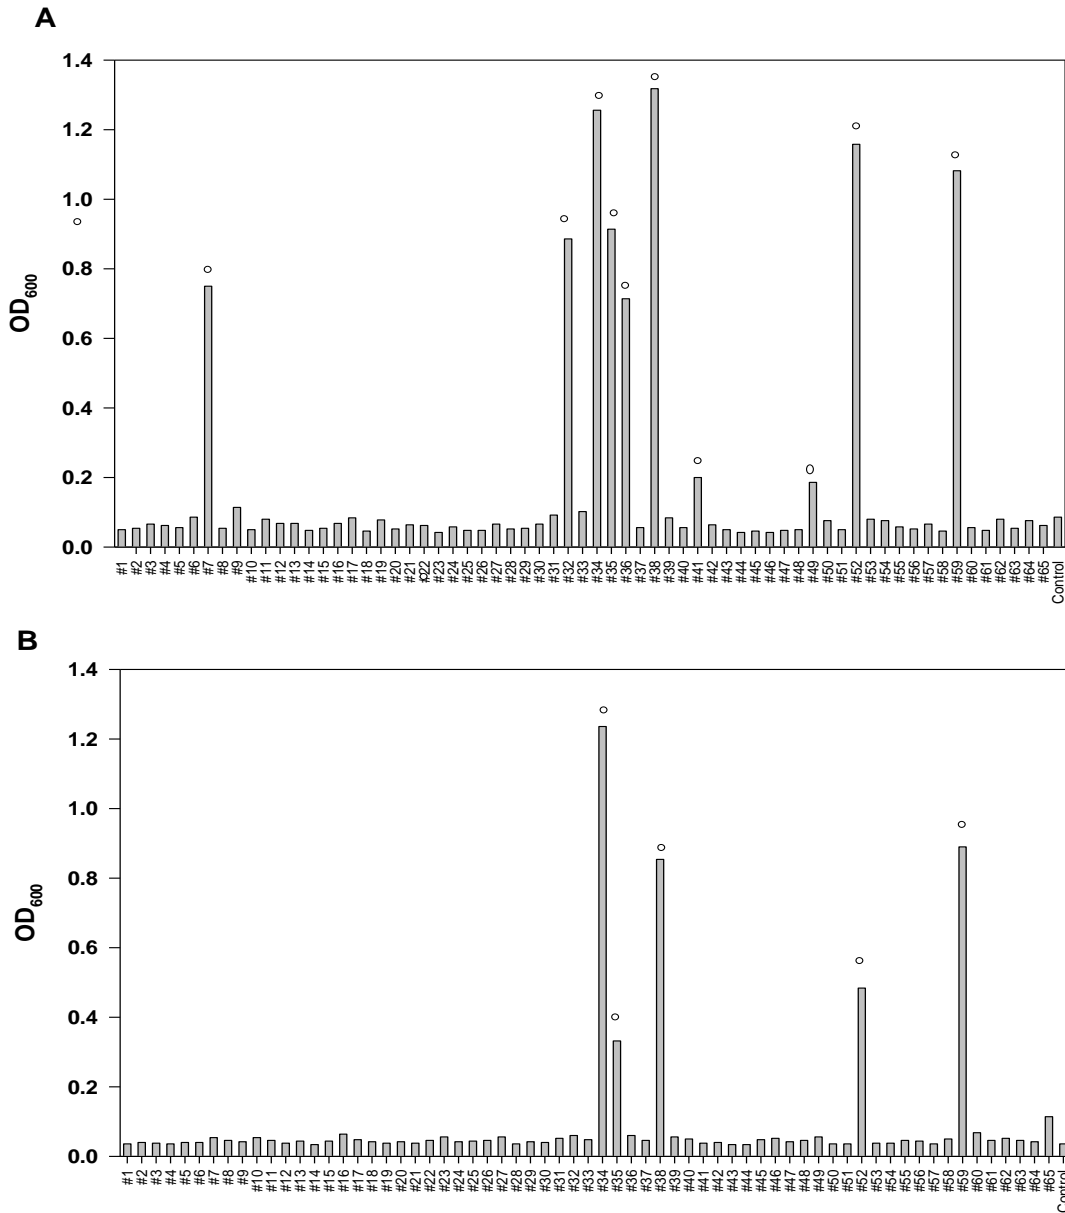

3

4 **Figure S1.** Cell growth performances of 65 yeast genomic library transformants in SC media  
5 containing glucose (20 g/L)+acetic acid (2.5 g/L) (A), or xylose (20 g/L)+acetic acid(2.5 g/L)  
6 (B). Cell growths were measured at 60 hr (A) or 106 hr (B). The hollow circles present the  
7 selected fast-growing transformants.

8 **Fig. S2**

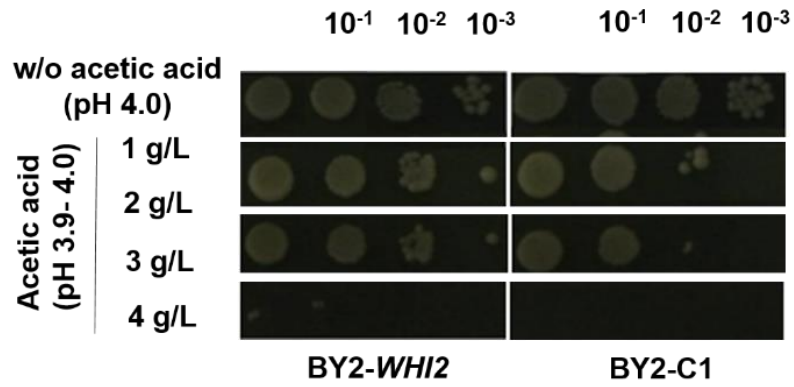

9

10 **Figure S2.** Increased cell growth conferred by overexpressing *WHI2* in the strain BY4742. Cells  
11 were grown on minimal medium agar plates containing glucose (20 g/L), amended with various  
12 concentrations of acetic acid or without acetic acid. Cells of the strain BY2-*WHI2* or the control  
13 strain BY2-C1 were spotted with serial dilution by a factor of 10.

14

15

16

17

18 Fig. S3

19

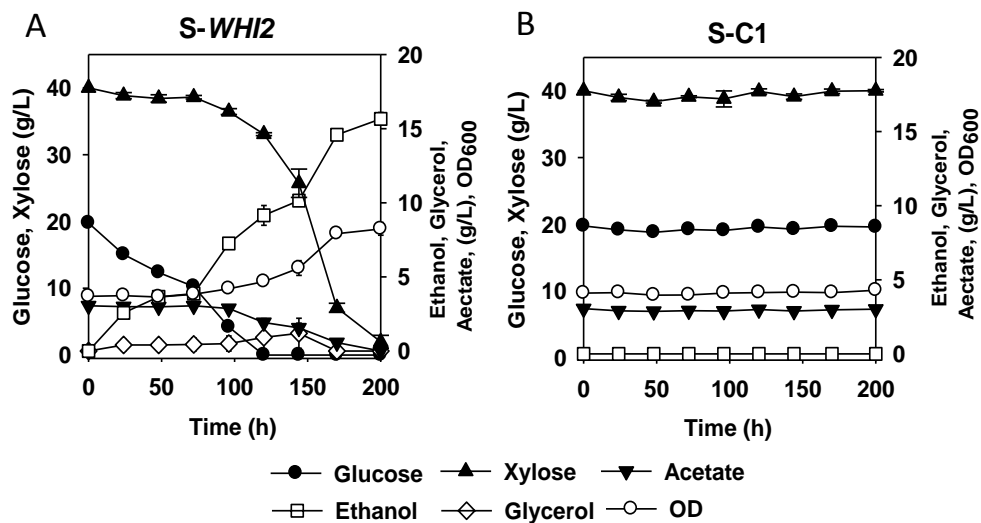

20

21

22 **Figure S3.** Improved fermentation by the strain *S-WHI2* (A) compared to the control strain *S-C1*  
23 (B) in corn stover hydrolysate with 50% v/v YP medium under oxygen limited condition. Results  
24 are the means of duplicate experiments; error bars indicating standard deviations are not visible  
25 when smaller than the symbol size.

26

27 **Fig. S4**

28

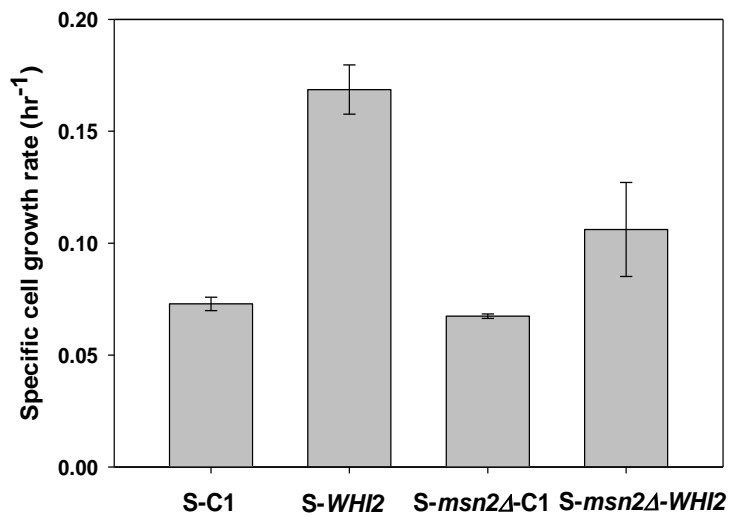

29

30 **Figure S4.** Specific cell growth rates of the strains S-C1, S-WHI2, S-msn2Δ-C1 and S-msn2Δ-  
31 WHI2 in SC media containing glucose (20 g/L) with 2 g/L acetic acid. Results are the means of  
32 triplicate experiments; error bars indicate standard deviations.

33

34 **Fig. S5**

35

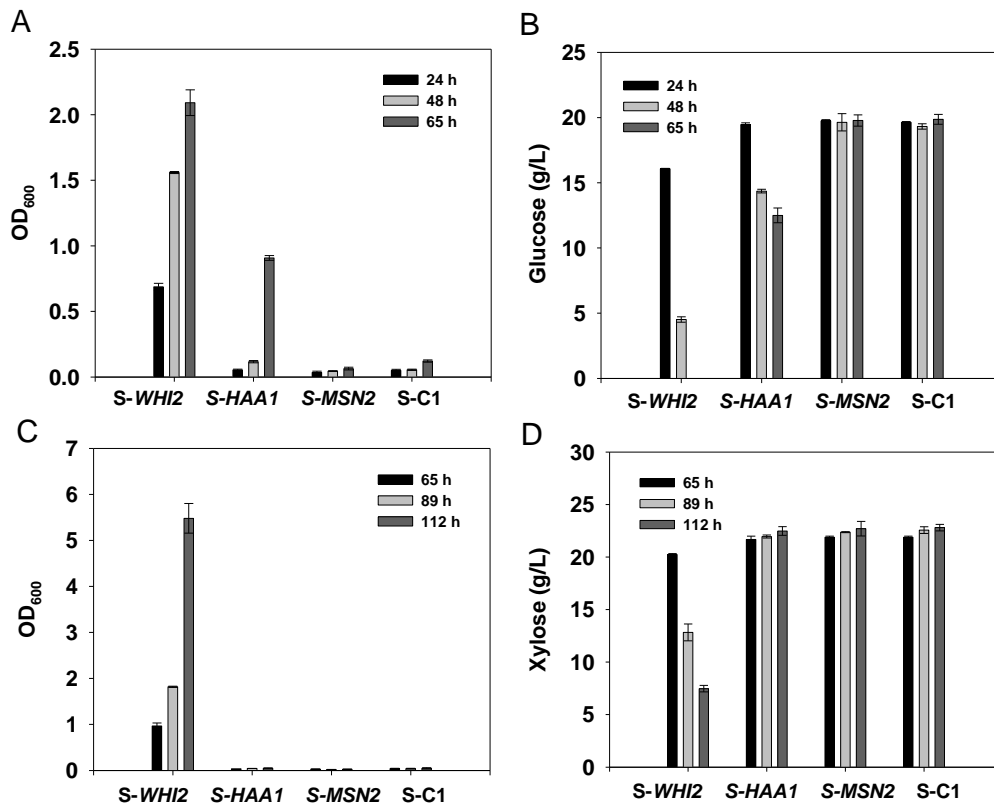

36

37

38 **Figure S5.** Acetic acid resistance of the engineered strains overexpressing the selected gene  
39 targets in SC media containing glucose (A and B) or xylose (C and D) with 2.5 g/L acetic acid.  
40 Cell growth (A and C) and sugar consumption (B and D) were measured. Results are the means  
41 of triplicate experiments; error bars indicating standard deviations are not visible when smaller  
42 than the symbol size.

43

44 **Table S1.** Primers for PCR amplification and sequencing

| <b>Target</b>       | <b>Primer sequence</b>                                                                       |
|---------------------|----------------------------------------------------------------------------------------------|
| <i>WHI2</i>         | Forward GCCGGATCCAAAAATGGACGATATAATCACGCAAG<br>Reverse GCCGTCGACTCACTGCACCCCAATAACGC         |
| <i>HAA1</i>         | Forward GCCACTAGTATGGTCTTGATAAATGGCATAAAG<br>Reverse GCCGGATCCTCATAACGAAGACATGAAATTATC       |
| <i>MSN2</i>         | Forward GCCACTAGTATGACGGTCGACCATGATTTC<br>Reverse GCCGGATCCTTAAATGTCTCCATGTTTTTTATG          |
| <i>PSR1</i>         | Forward GCCGGATCCAAAAATGGGTTTCATATCGTCAATACTG<br>Reverse GCCGTCGACTTATATTGTTACATCCAAAATTTTGC |
| msn2-F              | CCTTGGAGATAACAGAACTAGTC                                                                      |
| msn2-R              | Reverse CGTGTATCTAAGTTGTTACAGGC                                                              |
| T3 promoter         | AATTAACCCTCACTAAAGGG                                                                         |
| T7 promoter         | TAATACGACTCACTATAGGG                                                                         |
| <i>WHI2</i> (q-PCR) | Forward TCTTCGGCTCTTGGAAAGAT<br>Reverse AATCGGACGGGTACAATGAT                                 |
| <i>UBC6</i> (q-PCR) | Forward TACAAACCACCGGCTATCAG<br>Reverse CCAGCCAGGATTCCAAGTAT                                 |

45

46

**Table S2. Summary of fermentation performances of the strains S-WHI2 and S-C1 under different conditions.**

| Sugar             | Condition                                          | Strains | $\mu^*$     | $Y_{\text{ethanol}}$ | $r_{\text{sugar}}^*$ | $P_{\text{ethanol}}^*$ | pH <sub>0</sub> | pH <sub>t</sub> |
|-------------------|----------------------------------------------------|---------|-------------|----------------------|----------------------|------------------------|-----------------|-----------------|
| 20 g/l<br>Glucose | No acetic acid under oxygen limited condition      | S-WHI2  | 0.087±0.002 | 0.344±0.007          | 1.625±0.003          | 0.537±0.012            | 3.98±0.000      | 3.51±0.000      |
|                   |                                                    | S-C1    | 0.089±0.002 | 0.356±0.002          | 1.739±0.021          | 0.619±0.004            | 3.98±0.000      | 3.56±0.007      |
|                   | 2.5 g/L acetic acid under oxygen limited condition | S-WHI2  | 0.030±0.001 | 0.456±0.002          | 1.846±0.019          | 0.842±0.011            | 4.01±0.000      | 3.32±0.007      |
|                   |                                                    | S-C1    | n.d.        | 0.373±0.000          | 0.355±0.000          | 0.130±0.003            | 4.01±0.000      | 3.75±0.000      |
|                   | 2.5 g/L acetic acid under anaerobic condition      | S-WHI2  | 0.025±0.002 | 0.502±0.010          | 1.991±0.024          | 0.999±0.008            | 4.01±0.000      | 3.23±0.001      |
|                   |                                                    | S-C1    | n.d.        | 0.451±0.008          | 0.399±0.003          | 0.180±0.008            | 4.01±0.000      | 3.81±0.000      |
| 20 g/l<br>Xylose  | No acetic acid under oxygen limited condition      | S-WHI2  | 0.046±0.003 | 0.227±0.016          | 0.464±0.025          | 0.092±0.012            | 4.00±0.000      | 3.41±0.000      |
|                   |                                                    | S-C1    | 0.049±0.001 | 0.232±0.015          | 0.428±0.016          | 0.099±0.010            | 4.00±0.000      | 3.46±0.005      |
|                   | 2.5 g/L acetic acid under oxygen limited condition | S-WHI2  | 0.015±0.000 | 0.278±0.017          | 0.245±0.004          | 0.068±0.005            | 4.01±0.000      | 3.28±0.000      |
|                   |                                                    | S-C1    | 0.003±0.001 | n.d.                 | n.d.                 | n.d.                   | 4.01±0.000      | 3.81±0.000      |
|                   | 1.5 g/L acetic acid under anaerobic condition      | S-WHI2  | 0.001±0.000 | 0.328±0.013          | 0.227±0.031          | 0.074±0.007            | 3.99±0.000      | 3.40±0.001      |
|                   |                                                    | S-C1    | 0.001±0.000 | 0.339±0.003          | 0.195±0.000          | 0.066±0.001            | 3.99±0.000      | 3.54±0.002      |

Note:

$\mu^*$ : specific growth rate (hr<sup>-1</sup>);

$Y_{\text{ethanol}}$ : ethanol yield (g ethanol/g sugar);

$r_{\text{sugar}}^*$ : specific sugar consumption rate (g sugar/g dry cell wt/hr);

$P_{\text{ethanol}}^*$ : specific ethanol productivity (g ethanol/g dry cell wt/hr);

pH<sub>0</sub>: initial pH;

pH<sub>t</sub>: pH at the end of fermentation.
